# Supplementary material for: Combined PI3K Inhibitor and Eribulin Enhances Anti-Tumor Activity in Preclinical Models of Paclitaxel-Resistant, PIK3CA-Mutated Endometrial Cancer
Source: MDPI journal article supplement (doi:10.3390/cancers15194887), 2023-10-08
Supplement: s1 [file s1]

# **Supplementary Materials: Combined PI3K Inhibitor and Eribulin Enhances Anti-Tumor Activity in Preclinical Models of Paclitaxel-Resistant, PIK3CA-Mutated Endometrial Cancer**

**Yeong Gyu Jeong, Nar Bahadur Katuwal, Min Sil Kang, Mithun Ghosh, Sa Deok Hong, Seong Min Park, Seul-Gi Kim, Tae Hoen Kim, Yong Wha Moon**

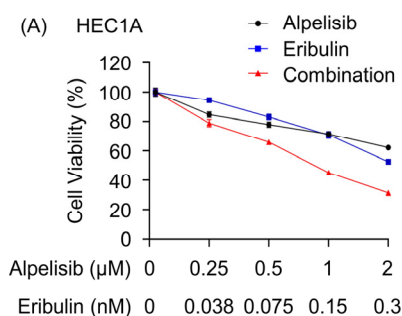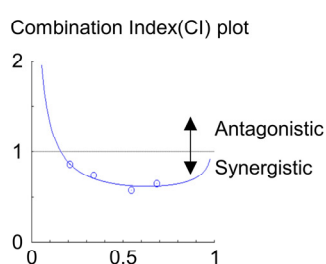

CI data for constant combination ratio

| Alpelisib ( $\mu\text{M}$ ) | Eribulin (nM) | Effect | CI    |
|-----------------------------|---------------|--------|-------|
| 0.25                        | 0.038         | 0.211  | 0.863 |
| 0.5                         | 0.075         | 0.341  | 0.739 |
| 1                           | 0.15          | 0.548  | 0.573 |
| 2                           | 0.3           | 0.685  | 0.645 |

CI > 1: Antagonism, CI = 1: Additive, CI < 1: Synergism

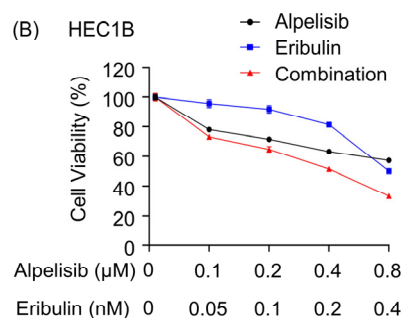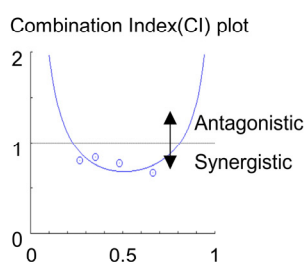

CI data for constant combination ratio

| Alpelisib ( $\mu\text{M}$ ) | Eribulin (nM) | Effect | CI    |
|-----------------------------|---------------|--------|-------|
| 0.1                         | 0.05          | 0.267  | 0.807 |
| 0.2                         | 0.1           | 0.352  | 0.846 |
| 0.4                         | 0.2           | 0.485  | 0.780 |
| 0.8                         | 0.4           | 0.667  | 0.679 |

CI > 1: Antagonism, CI = 1: Additive, CI < 1: Synergism

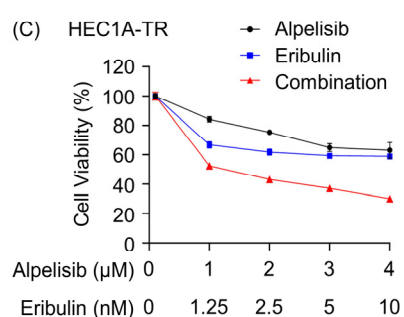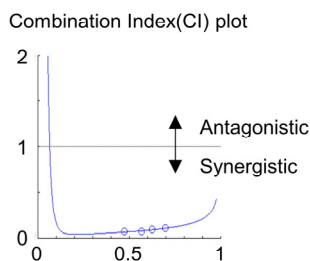

CI data for constant combination ratio

| Alpelisib ( $\mu\text{M}$ ) | Eribulin (nM) | Effect | CI    |
|-----------------------------|---------------|--------|-------|
| 1                           | 1.25          | 0.474  | 0.074 |
| 2                           | 2.5           | 0.567  | 0.077 |
| 4                           | 5             | 0.627  | 0.099 |
| 8                           | 10            | 0.699  | 0.112 |

CI > 1: Antagonism, CI = 1: Additive, CI < 1: Synergism

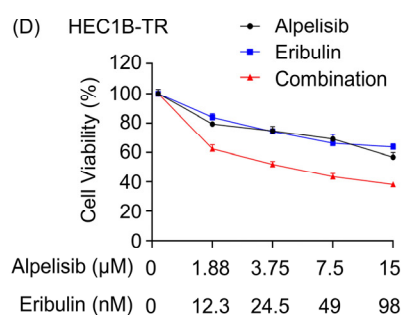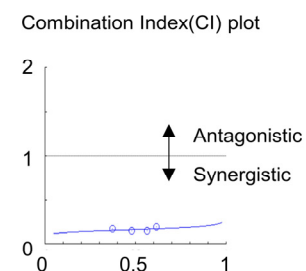

CI data for constant combination ratio

| Alpelisib ( $\mu\text{M}$ ) | Eribulin (nM) | Effect | CI    |
|-----------------------------|---------------|--------|-------|
| 1.88                        | 12.3          | 0.374  | 0.170 |
| 3.75                        | 24.5          | 0.479  | 0.145 |
| 7.5                         | 49            | 0.564  | 0.148 |
| 15                          | 98            | 0.618  | 0.190 |

CI > 1: Antagonism, CI = 1: Additive, CI < 1: Synergism

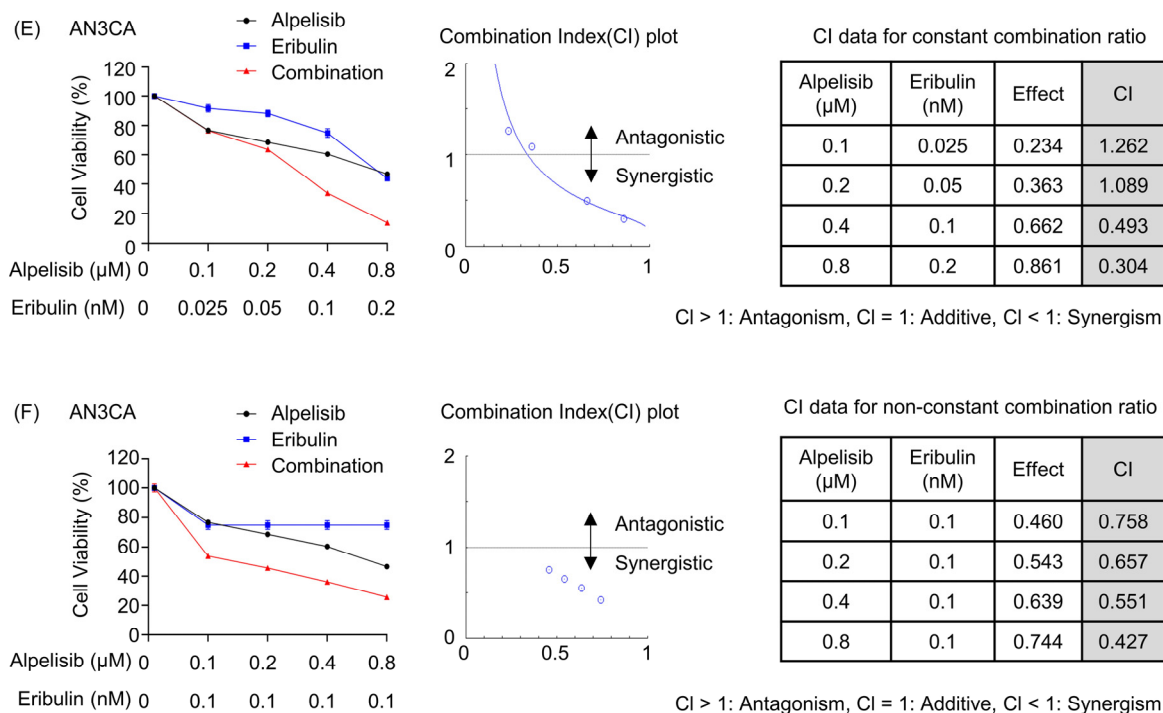

**Figure S1.** Cell proliferation MTT assay of paclitaxel-sensitive (HEC1A, HEC1B, AN3CA) and paclitaxel-resistant cells (HEC1A-TR, HEC1B-TR) after treatment with alpelisib and eribulin at constant and non-constant combination ratios (A-D) Cell proliferation assay (MTT) of paclitaxel-sensitive cells (HEC1A, HEC1B) and paclitaxel-resistant cells (HEC1A-TR, HEC1B-TR) after treatment with alpelisib and eribulin at a constant combination ratio. (E-F) Cell proliferation assay (MTT) of paclitaxel-sensitive cells (AN3CA) after treatment with alpelisib and eribulin (E) at a constant combination ratio or (F) at a non-constant ratio for 72h. The CI values were calculated by the Chou-Talalay method. CI < 1, CI > 1, and CI = 1 indicate synergism, antagonism, and additive effect, respectively. Three independently repeated experiments were performed with similar results.

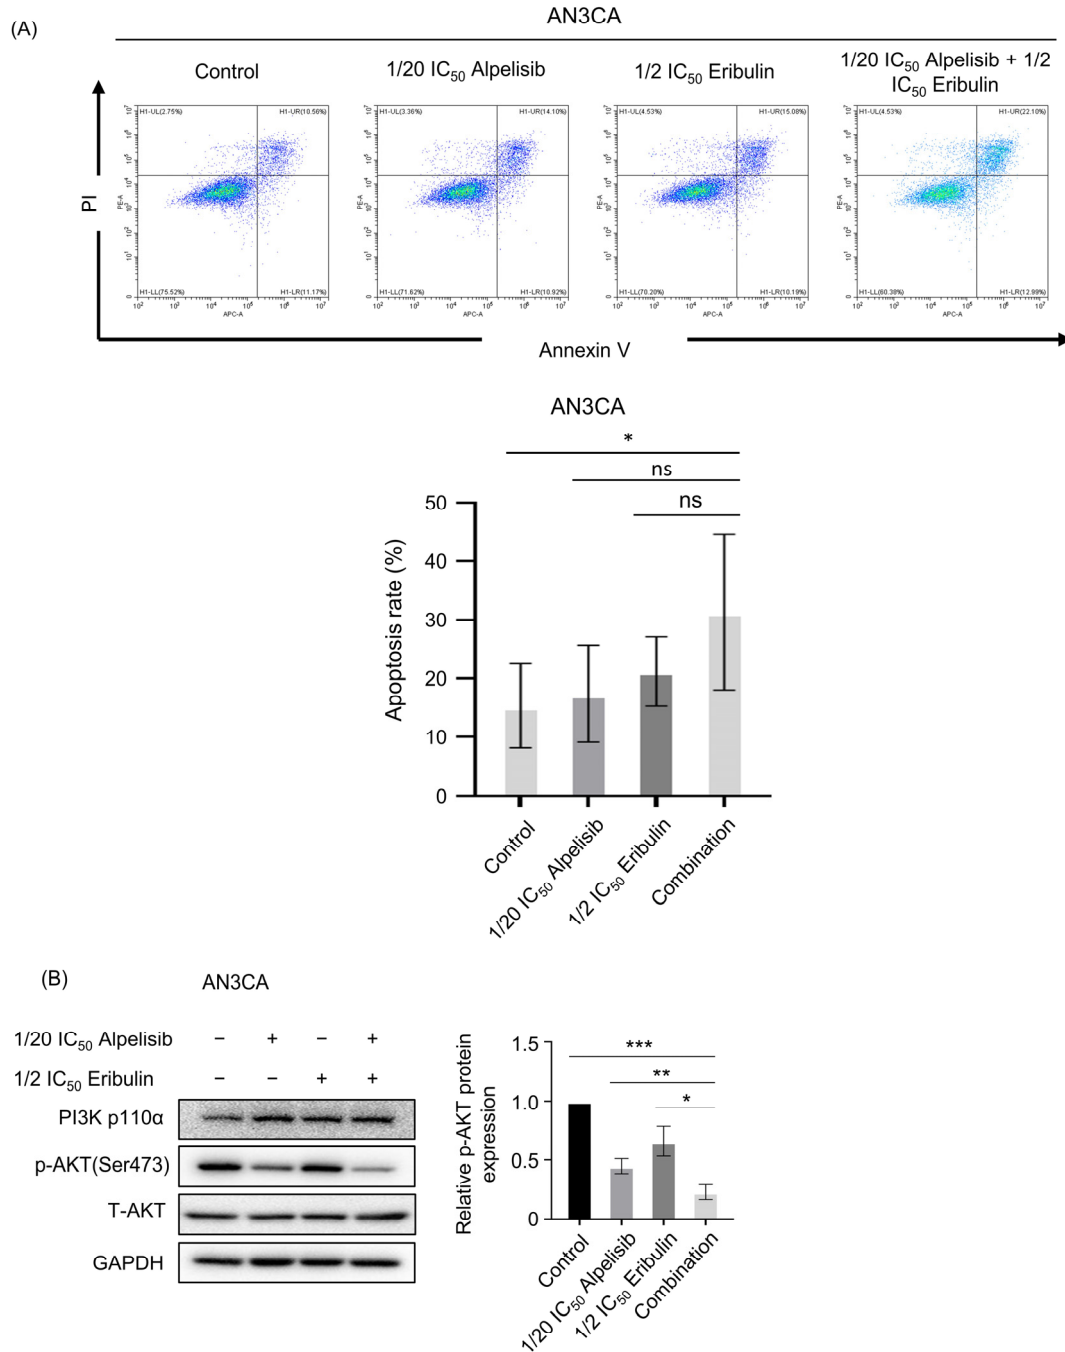

**Figure S2.** Apoptosis assay (annexin V-APC/PI) and western blot analysis of PI3K/AKT in paclitaxel-sensitive cells (AN3CA) after treatment with alpelisib or eribulin and their combination (A) Apoptosis assay with flow cytometry using annexin V-APC/PI staining in paclitaxel-sensitive cells (AN3CA) after treatment with alpelisib or eribulin and their combination for 72h. The data shown are representative of three independent experiments. Data are presented as mean  $\pm$  standard deviation from three independent experiments. *P*-values were calculated by Student's *t*-test, indicating \* *p* < 0.05, \*\* *p* < 0.01, and \*\*\* *p* < 0.001. (B) Western blots showing changes in the PI3K/AKT pathway-related genes in paclitaxel-sensitive cells (AN3CA) after treatment with alpelisib or eribulin and their combination for 48h. Data are presented as mean  $\pm$  standard deviation from three independent experiments. *P*-values were calculated by Student's *t*-test, indicating \* *p* < 0.05, \*\* *p* < 0.01, and \*\*\* *p* < 0.001.

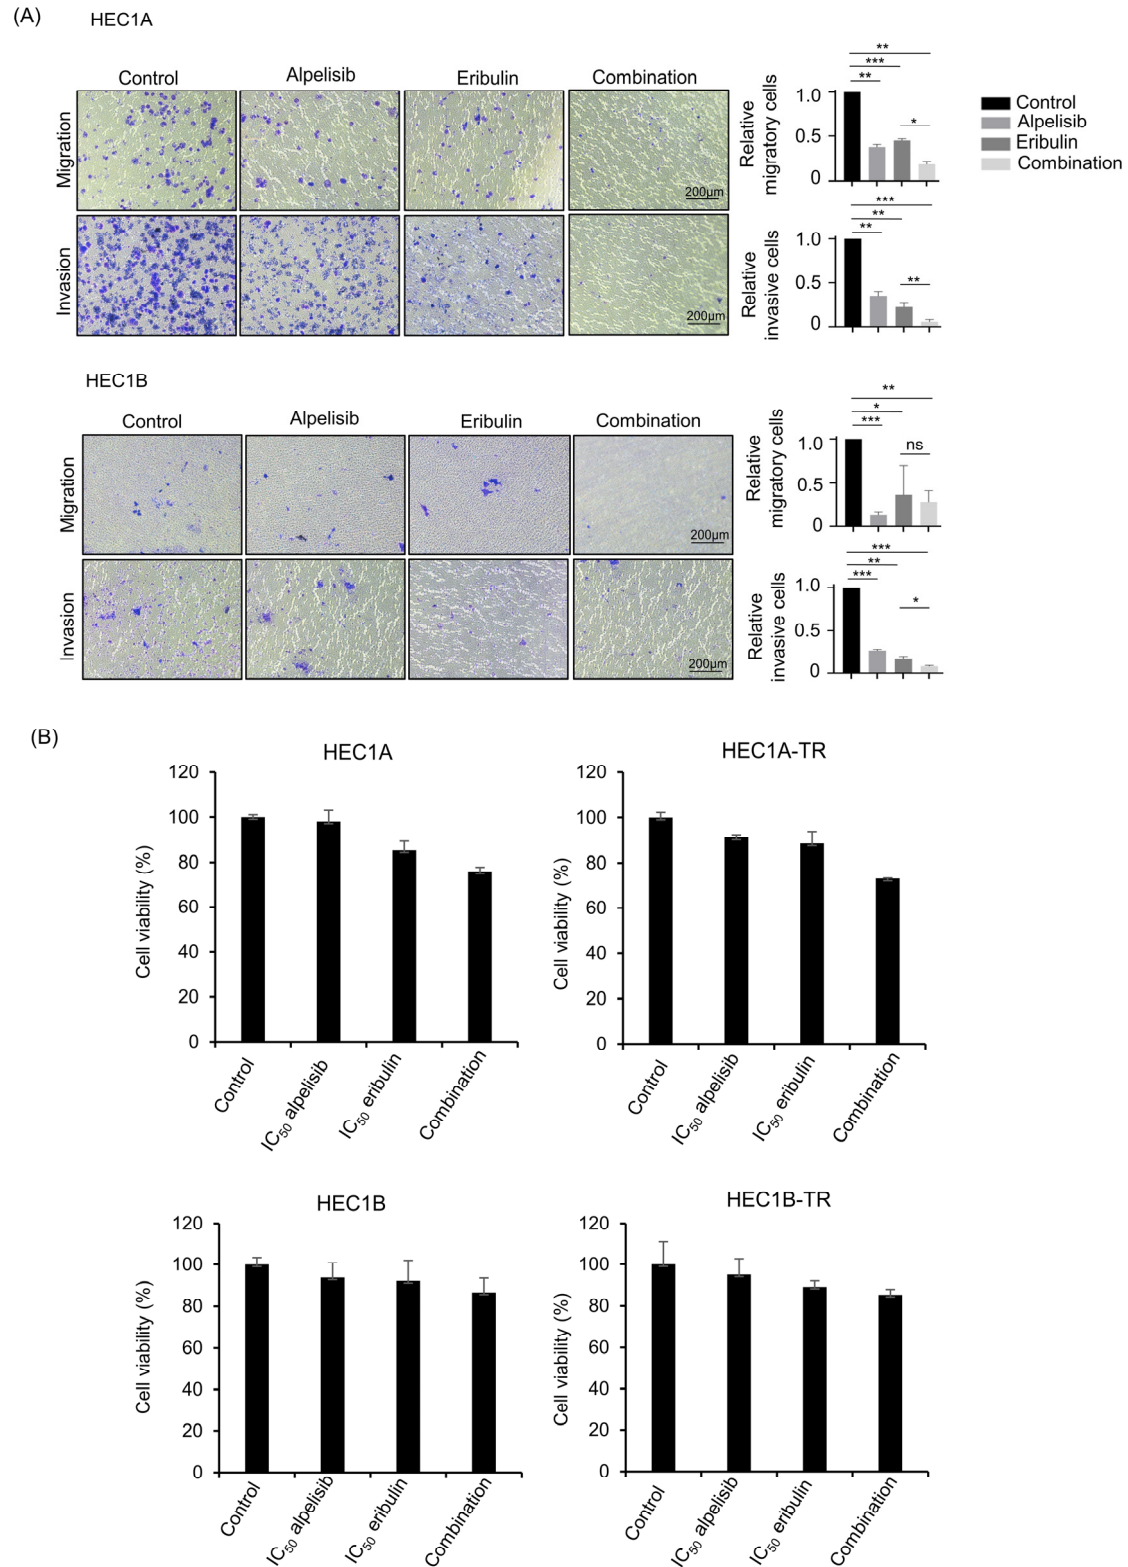

**Figure S3.** Migration and invasion assay of HEC1A and HEC1B cells; MTT assay of HEC1A, HEC1A-TR, HEC1B and HEC1B-TR cells (A) Representative images of migration and invasion assay of HEC1A and HEC1B cells after treatment with  $IC_{50}$  concentration of alpelisib, eribulin and their combination. The number of migratory and invading cells from three different non-overlapping 100  $\times$  microscopic fields is expressed as relative mean  $\pm$  SD in the right panel. Independent sample t-test: \* $p < 0.05$ , \*\* $p < 0.01$ , \*\*\* $p < 0.001$ , Abbreviation: ns, not significant. (B) MTT assay of HEC1A, HEC1A-TR, HEC1B and HEC1B-TR cells with their respective  $IC_{50}$  concentration of alpelisib, eribulin and combination for 24 h.

Figure 4.

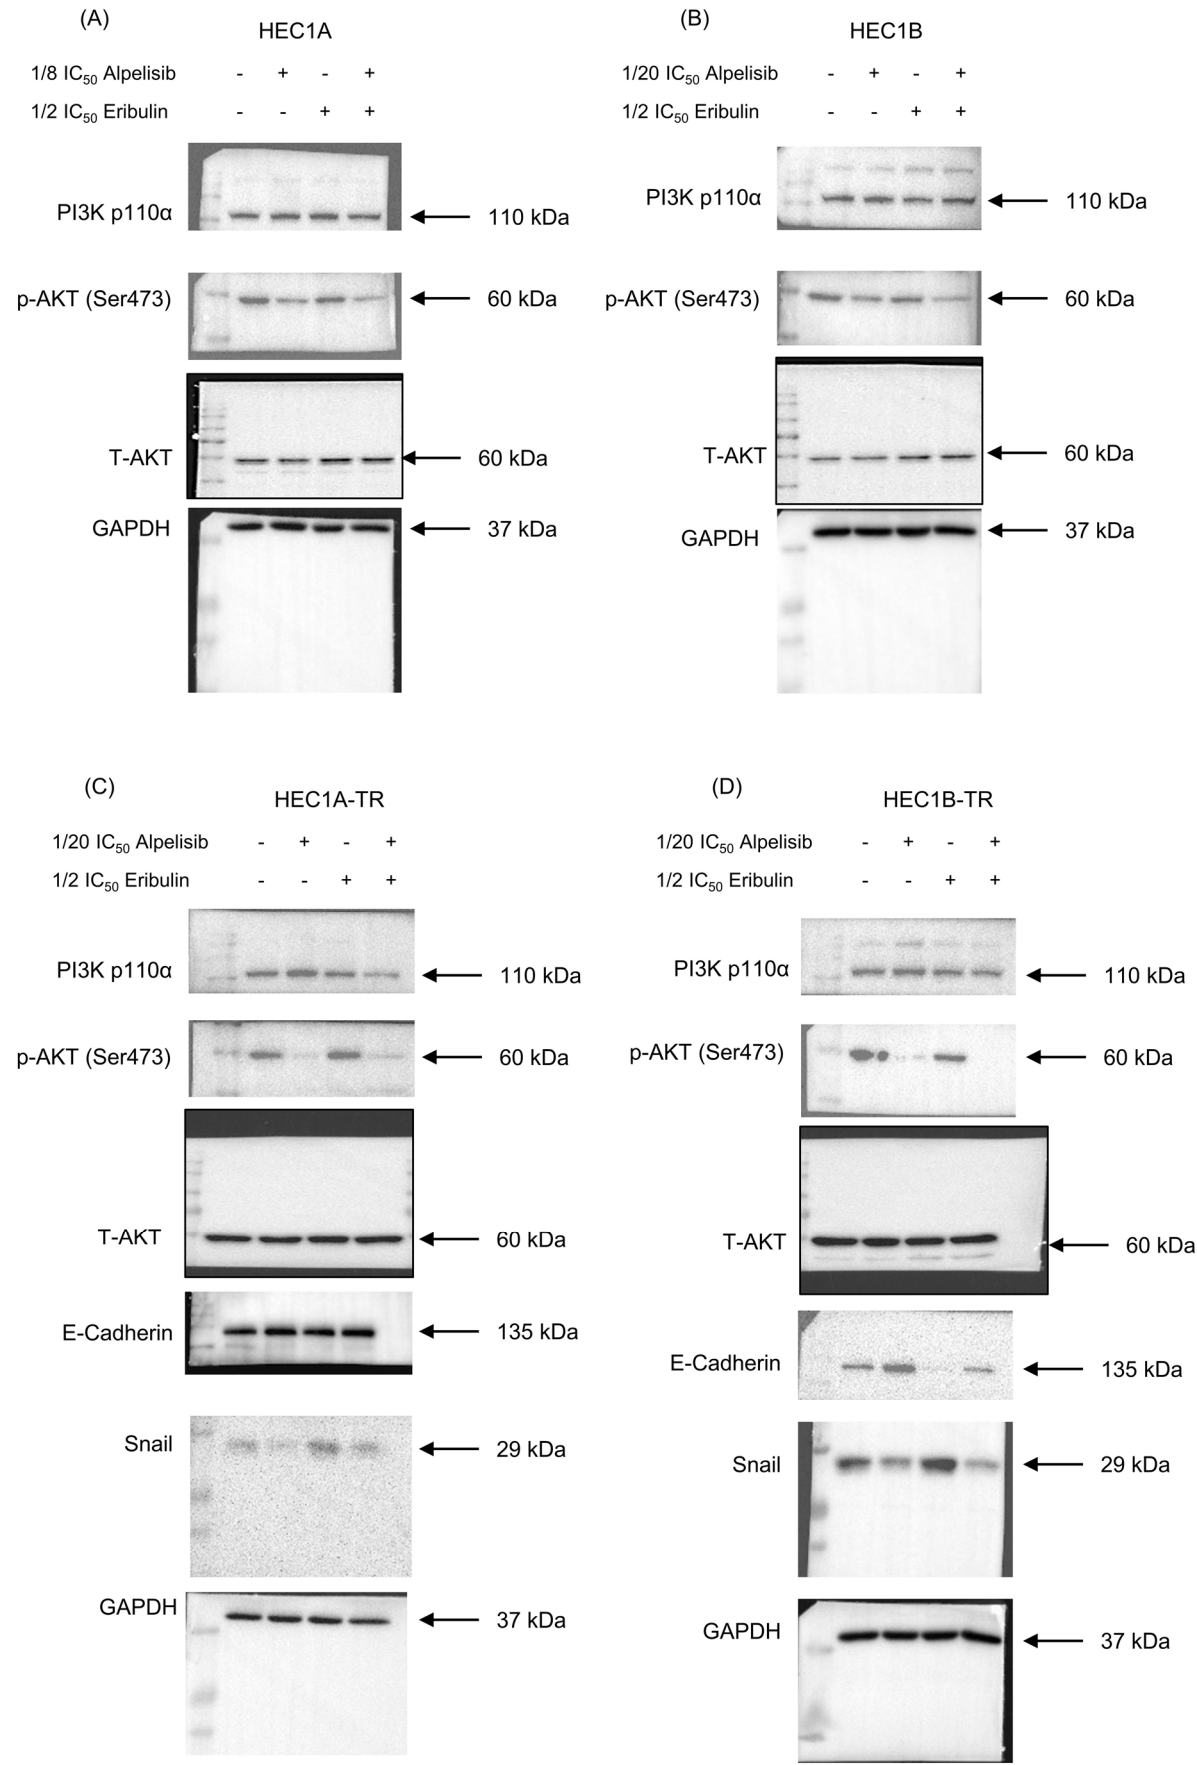

Figure 5.

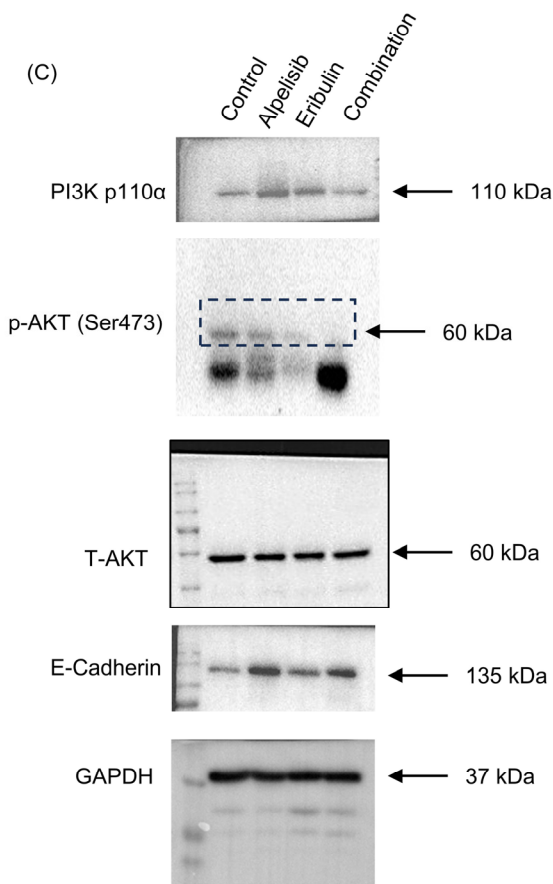

Figure S2.

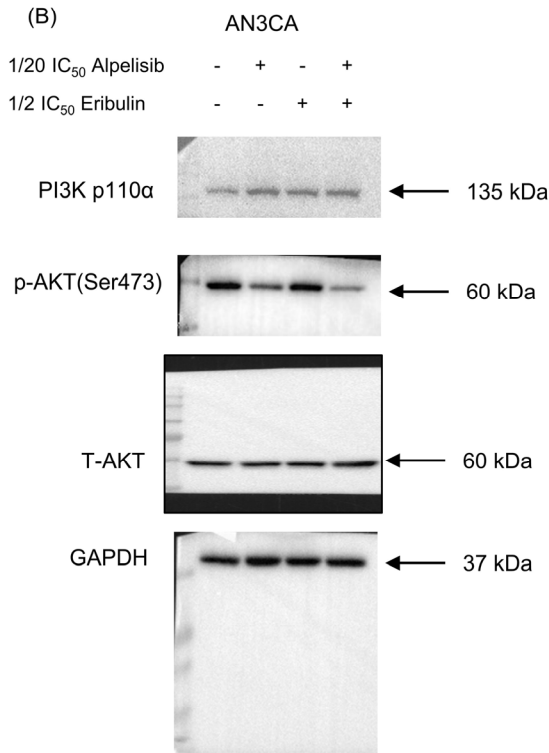

Figure S4. Uncropped western blots.

**Table S1.** List of primary and secondary antibodies used in western blot.

| Antibody        | Host species | Dilution | Company (catalog no.)                              |
|-----------------|--------------|----------|----------------------------------------------------|
| PI3K p110a      | Rabbit       | 1:1000   | 4249S, Cell Signaling, Danvers, Massachusetts, USA |
| p-AKT (Ser473)  | Rabbit       | 1:1000   | 4060S, Cell Signaling, Danvers, Massachusetts, USA |
| AKT             | Rabbit       | 1:1000   | 9272S, Cell Signaling, Danvers, Massachusetts, USA |
| PTEN            | Rabbit       | 1:1000   | 9559S, Cell Signaling, Danvers, Massachusetts, USA |
| E-Cadherin      | Rabbit       | 1:1000   | 3195S, Cell Signaling, Danvers, Massachusetts, USA |
| Snail           | Rabbit       | 1:1000   | 3879S, Cell Signaling, Danvers, Massachusetts, USA |
| ZEB1            | Rabbit       | 1:1000   | ab124512, abcam                                    |
| LAMC2           | Rabbit       | 1:1000   | sc-28330, Santa Cruz, Dallas, Texas, USA           |
| GAPDH           | Rabbit       | 1:1000   | 2118S, Cell Signaling, Danvers, Massachusetts, USA |
| Anti-Rabbit HRP | Goat         | 1:5000   | GTX213110-01, GeneTex, CA 92606, USA               |

**Table S2.** Summary of IC<sub>50</sub> of endometrial cancer cell lines for several drugs.

|          | Paclitaxel IC <sub>50</sub> (nM) | Incubation time (h) | Alpelisib IC <sub>50</sub> (uM) | Incubation time (h) | Eribulin IC <sub>50</sub> (nM) | Incubation time (h) |
|----------|----------------------------------|---------------------|---------------------------------|---------------------|--------------------------------|---------------------|
| HEC1A    | 6.8                              | 72                  | 2                               | 72                  | 0.3                            | 72                  |
| HEC1A-TR | 111                              | 72                  | 8                               | 72                  | 10                             | 72                  |
| HEC1B    | 15                               | 72                  | 0.8                             | 72                  | 0.4                            | 72                  |
| HEC1B-TR | 160                              | 72                  | 15                              | 72                  | 98                             | 72                  |
| AN3CA    | 3.6                              | 72                  | 0.8                             | 72                  | 0.2                            | 72                  |

**Table S3.** (A) Summary of clinical trials with PI3K-targeting agents in metastatic endometrial cancers.

| Author<br>(reference) | Year | Phase | N   | Setting                                                              | PI3K-targeting agent (target)/<br>Combinators  | Median PFS (month)                                                                                            | Median OS (month)                                                                                            |
|-----------------------|------|-------|-----|----------------------------------------------------------------------|------------------------------------------------|---------------------------------------------------------------------------------------------------------------|--------------------------------------------------------------------------------------------------------------|
| Oza [1]               | 2011 | II    | 60  | 1 <sup>st</sup> line: 27<br>2 <sup>nd</sup> line or more: 33         | Temsirolimus (mTOR)                            | 7.33 mo in 1 <sup>st</sup> line<br>3.25 mo in 2 <sup>nd</sup> or more line                                    | OS not-mentioned                                                                                             |
| Alvarez [2]           | 2013 | II    | 49  | 2 <sup>nd</sup> ~3 <sup>rd</sup> line                                | Temsirolimus (mTOR)/bevacizumab                | 5.6 mo                                                                                                        | 16.9 mo                                                                                                      |
| Oza [3]               | 2015 | II    | 64  | 2 <sup>nd</sup> ~3 <sup>rd</sup> line                                | Arm 1: Ridaforolimus (mTOR)                    | 3.6 mo                                                                                                        | 10.0 mo                                                                                                      |
|                       |      |       | 66  |                                                                      | Arm2: Progestin or any chemotherapy            | 1.9 mo; P=0.008                                                                                               | 9.6 mo; P=0.604                                                                                              |
| Slomovitz [4]         | 2015 | II    | 38  | 1 <sup>st</sup> line: 3<br>2 <sup>nd</sup> ~3 <sup>rd</sup> line: 35 | Everolimus (mTOR)/letrozole                    | 3.0 mo                                                                                                        | 14 mo                                                                                                        |
| Aghajanian [5]        | 2018 | II    | 115 | 1 <sup>st</sup> line                                                 | Temsirolimus (mTOR)/<br>paclitaxel/carboplatin | PFS, not-mentioned<br>HR 1.22 (92% CI: 0.96-1.55) in<br>temsirolimus arm, compared with<br>historical control | OS, not-mentioned<br>HR 0.99 (92% CI: 0.78-1.26) in<br>temsirolimus arm, compared with<br>historical control |
| Myers [6]             | 2020 | II    | 36  | 2 <sup>nd</sup> ~3 <sup>rd</sup> line                                | MK2206 (AKT)                                   | 1.7 mo in PIK3CA mutated pts, 2.5<br>mo in PIK3CA wild type pts                                               | 8.4 mo in PIK3CA mutated pts, 11.1<br>mo in PIK3CA wild type pts                                             |
| Rubinstein [7]        | 2020 | II    | 28  | 2 <sup>nd</sup> ~4 <sup>th</sup> line                                | LY3023414 (dual PI3K/mTOR)                     | 2.5 mo                                                                                                        | 9.2 mo                                                                                                       |

Abbreviations: N, number of patients; PFS, progression-free survival; OS, overall survival; HR, hazard ratio; mo, month; CI, confidence interval; pts, patients

## References

1. Oza, A.M.; Elit, L.; Tsao, M.S.; Kamel-Reid, S.; Biagi, J.; Provencher, D.M.; Gotlieb, W.H.; Hoskins, P.J.; Ghatage, P.; Tonkin, K.S.; et al. Phase II study of temsirolimus in women with recurrent or metastatic endometrial cancer: a trial of the NCIC Clinical Trials Group. *J Clin Oncol* **2011**, *29*, 3278-3285.
2. Alvarez, E.A.; Brady, W.E.; Walker, J.L.; Rotmensch, J.; Zhou, X.C.; Kendrick, J.E.; Yamada, S.D.; Schilder, J.M.; Cohn, D.E.; Harrison, C.R.; et al. Phase II trial of combination bevacizumab and temsirolimus in the treatment of recurrent or persistent endometrial carcinoma: A Gynecologic Oncology Group study. *Gynecol. Oncol.* **2013**, *129*, 22-27, <https://doi.org/10.1016/j.ygyno.2012.12.022>.
3. Oza, A.M.; Pignata, S.; Poveda, A.; McCormack, M.; Clamp, A.; Schwartz, B.; Cheng, J.; Li, X.; Campbell, K.; Dodion, P.; et al. Randomized Phase II Trial of Ridaforolimus in Advanced Endometrial Carcinoma. *J Clin Oncol* **2015**, *33*, 3576-3582.
4. Slomovitz, B.M.; Jiang, Y.; Yates, M.S.; Soliman, P.T.; Johnston, T.; Nowakowski, M.; Levenback, C.; Zhang, Q.; Ring, K.; Munsell, M.F.; et al. Phase II study of everolimus and letrozole in patients with recurrent endometrial carcinoma. *J Clin Oncol* **2015**, *33*, 930-936.
5. Aghajanian, C.; Filiaci, V.; Dizon, D.S.; Carlson, J.W.; Powell, M.A.; Secord, A.A.; Tewari, K.S.; Bender, D.P.; O'Malley, D.M.; Stuckey, A.; et al. A phase II study of frontline paclitaxel/carboplatin/bevacizumab, paclitax-el/carboplatin/temsirolimus, or ixabepilone/carboplatin/bevacizumab in advanced/recurrent endometrial cancer. *Gynecol Oncol* **2018**, *150*, 274-281.
6. Myers, A.P.; Konstantinopoulos, P.A.; Barry, W.T.; Luo, W.; Broaddus, R.R.; Makker, V.; Drapkin, R.; Liu, J.; Doyle, A.; Horowitz, N.S.; et al. Phase II, 2-stage, 2-arm, PIK3CA mutation stratified trial of MK-2206 in recurrent endometrial cancer. *Int J Cancer* **2020**, *147*, 413-422.
7. Rubinstein, M.M.; Hyman, D.M.; Caird, I.; Won, H.; Soldan, K.; Seier, K.; Iasonos, A.; Tew, W.P.; O'Cearbhaill, R.E.; Grisham, R.N.; et al. Phase 2 study of LY3023414 in patients with advanced endometrial cancer harboring activating mutations in the PI3K pathway. *Cancer* **2020**, *126*, 1274-1282.
